# Supplementary material for: Quality Evolution and Aroma Profile of Pointed Cabbage in Different Storage Regimes
Source: Front Plant Sci. 2022 Apr 15;13:852817. doi: 10.3389/fpls.2022.852817 (PMC9051525; doi:10.3389/fpls.2022.852817)
Supplement: Supplementary file 1 [file Table_1.XLSX]

## Sheet: Sheet1
	HARVEST			NORMAL AIR						1 kPa O2 + 1.5 kPa CO2						1 kPa O2 + 5 kPa CO2						3 kPa O2 + 1.5 kPa CO2						3 kPa O2 + 5 kPa CO2
	Harvest			February			May			February			May			February			May			February			May			February			May
Acetaldehyde	0.00595967	±	0.00385615	0.00480526	±	0.00251658	0.0025523	±	0.00266779	0.00889173	±	0.0072221	0.00506124	±	0.00448335	0.00806694	±	0.003395	0.00485048	±	0.00363411	0.00756433	±	0.00876592	0.00415368	±	0.00341394	0.00458819	±	0.00389227	0.00440955	±	0.0038298
Propan-2-one	0.00876188	±	0.00503699	0.0183654	±	0.0175013	0.00818013	±	0.00603209	0.0247348	±	0.0364162	0.017162	±	0.0131756	0.0141029	±	0.0155535	0.0137199	±	0.00942415	0.0138845	±	0.00860287	0.0192839	±	0.0242213	0.0164517	±	0.0116081	0.0181677	±	0.0184049
Carbon disulfide	0.0105922	±	0.00817868	0.0442782	±	0.0244425	0.0544542	±	0.0222196	0.0510621	±	0.0251156	0.0726302	±	0.0253422	0.0526757	±	0.0219411	0.0848631	±	0.02341	0.0494048	±	0.0210664	0.0684531	±	0.0338657	0.0528657	±	0.0238866	0.0771066	±	0.0288113
2-Butanone	0.00597275	±	0.00578639	0.0172731	±	0.00779441	0.00810632	±	0.00469419	0.0233947	±	0.00752557	0.0153771	±	0.00600474	0.0185518	±	0.0112291	0.0168337	±	0.00732628	0.0207866	±	0.00675699	0.0118171	±	0.00604748	0.0215308	±	0.00837644	0.0154208	±	0.0082934
2-ethoxy-2-methylpropane	0.00261141	±	0.00135443	0.00461558	±	0.0038084	0.00430483	±	0.00222391	0.00654357	±	0.00318277	0.009052	±	0.00456887	0.00444793	±	0.0050794	0.00800926	±	0.00408378	0.00578482	±	0.00345838	0.00604717	±	0.0038078	0.00530078	±	0.00345554	0.00808342	±	0.0056076
2-Methyl-2-butanol	0.00140002	±	0.000659472	0.00400014	±	0.00179244	0.00214893	±	0.000951057	0.00578147	±	0.00156686	0.0045661	±	0.00174959	0.004453	±	0.00311136	0.00489299	±	0.00257084	0.00516101	±	0.00180119	0.00366959	±	0.00208568	0.00509787	±	0.00228851	0.00420115	±	0.00167826
2-Butenenitrile	0.178505	±	0.032199	0.263264	±	0.0294492	0.270462	±	0.0453781	0.232676	±	0.05272	0.229596	±	0.032478	0.273366	±	0.0677681	0.260813	±	0.0429952	0.243971	±	0.0440207	0.259229	±	0.0377917	0.292533	±	0.0765962	0.29571	±	0.0568102
1-Penten-3-ol	0.0516375	±	0.00789988	0.03838	±	0.0142071	0.0267742	±	0.0135011	0.042271	±	0.0129399	0.0423096	±	0.0135853	0.0446824	±	0.0128389	0.0395164	±	0.0172342	0.040726	±	0.0158891	0.0429063	±	0.0217984	0.0362805	±	0.017474	0.0308044	±	0.0213173
Pentan-2-one	0.000270803	±	0.00114892	0.0166682	±	0.00881004	0.0105631	±	0.00549493	0.0230303	±	0.00902501	0.0187353	±	0.0056908	0.0175069	±	0.0162143	0.0188396	±	0.00806233	0.021371	±	0.0100565	0.0142004	±	0.00782219	0.0226958	±	0.0105831	0.0177767	±	0.00703588
Methyl thiocyanate	0.0135814	±	0.00688707	0.0115646	±	0.0040343	0.00426276	±	0.00235889	0.015623	±	0.0034452	0.011305	±	0.00394382	0.0173634	±	0.00384731	0.0123196	±	0.00315581	0.0143434	±	0.00297696	0.00951894	±	0.00320244	0.0154462	±	0.00558829	0.01053	±	0.00488848
2-Methylbutanenitrile	0.00228588	±	0.00120288	0.00359696	±	0.000897267	0.00301037	±	0.000743574	0.00360952	±	0.00131784	0.00359984	±	0.00159447	0.00310905	±	0.00155209	0.00381945	±	0.00080079	0.00400109	±	0.00142197	0.00359471	±	0.00150129	0.00303644	±	0.0015923	0.00282883	±	0.00114692
3-Methylbutanenitrile	0.0069669	±	0.00156621	0.0109483	±	0.00286063	0.00923667	±	0.00227808	0.0125092	±	0.00305252	0.0119677	±	0.00220121	0.0106428	±	0.00388741	0.0121827	±	0.00304195	0.0112063	±	0.00217827	0.0117265	±	0.00296985	0.0108838	±	0.00296672	0.011718	±	0.00220892
4-methylpentan-2-one	0.000456346	±	0.000400517	0.00374374	±	0.00178538	0.00259509	±	0.00102894	0.00508479	±	0.00189783	0.00445614	±	0.00146339	0.00382208	±	0.00354156	0.00433528	±	0.00194482	0.00478189	±	0.00195294	0.00358791	±	0.00150324	0.00485378	±	0.00229317	0.00395556	±	0.00153701
Dimethyl disulfide	5.84903e-05	±	0.000248153	0.000129558	±	0.000314309	0.000225372	±	0.000353973	0.00110844	±	0.00188745	0.000177622	±	0.000446738	0.000907344	±	0.00103433	3.05812e-05	±	0.00012609	0.000489073	±	0.000794469	0.000231698	±	0.000384086	0.0013206	±	0.0029753	0.00058563	±	0.000827942
2,2,5,5-Tetramethyloxolane	0.00023642	±	0.000245391	0.000509696	±	0.000365505	0.000535773	±	0.000232772	0.000818077	±	0.000228633	0.00101041	±	0.000368443	0.000500957	±	0.000520989	0.00092191	±	0.000365426	0.000759044	±	0.000346699	0.000710669	±	0.000300976	0.000619886	±	0.000340708	0.000847359	±	0.000476282
3-methyl-2-butenal	0.00483107	±	0.00232725	0.0080956	±	0.00193536	0.00941652	±	0.00289557	0.00462393	±	0.00416099	0.00673739	±	0.00403294	0.00635379	±	0.00344716	0.0074957	±	0.0042919	0.00765284	±	0.00370637	0.00900859	±	0.0030781	0.00880086	±	0.00266446	0.00970395	±	0.00407074
Pentan-1-ol	0.000835134	±	0.000896162	0.00160467	±	0.000693508	0.000201588	±	0.000268531	0.00211424	±	0.0012196	0.00183647	±	0.00131179	0.00190155	±	0.00102144	0.00162895	±	0.000695091	0.0019018	±	0.000815928	0.001186	±	0.000722309	0.00213321	±	0.00097202	0.00161446	±	0.00107737
cis-2-Penten-1-ol	0.0148444	±	0.00224949	0.0079911	±	0.0043527	0.00596333	±	0.00330385	0.00789488	±	0.00348547	0.00761228	±	0.00249978	0.00910315	±	0.00379935	0.0062253	±	0.00288876	0.00845091	±	0.00267463	0.00772058	±	0.00439404	0.00672885	±	0.00385119	0.00455363	±	0.00388505
Pentanenitrile	0.000940049	±	0.000670133	0.00158701	±	0.000370422	0.00161866	±	0.000255128	0.00172645	±	0.000561787	0.00205789	±	0.000635744	0.00142965	±	0.000582565	0.00202382	±	0.00037097	0.00171024	±	0.000679694	0.0018823	±	0.000390853	0.0015085	±	0.000673886	0.00187611	±	0.000462701
3-Hexenal	0.0134515	±	0.020557	0.01045	±	0.00845664	0.00459742	±	0.00607971	0.0166191	±	0.0186743	0.011285	±	0.00496214	0.018145	±	0.0102763	0.0101581	±	0.00552343	0.0175045	±	0.00966642	0.0116881	±	0.00933945	0.0123956	±	0.00965509	0.0058157	±	0.00443424
2-methyl-4-pentenal	0.0671457	±	0.059033	0.0116018	±	0.012191	0.00635138	±	0.0104556	0.0231456	±	0.0273055	0.0153682	±	0.0115804	0.0175374	±	0.0137377	0.0110605	±	0.011609	0.02054	±	0.0170763	0.0148641	±	0.0177518	0.0138736	±	0.0140544	0.0060005	±	0.00867773
4,4-Dimethyl-3-oxopentanenitrile	0.0408744	±	0.0177639	0.0585872	±	0.0110615	0.0545074	±	0.0153999	0.0593253	±	0.0111524	0.0637483	±	0.00683537	0.0509998	±	0.01415	0.0613405	±	0.0102203	0.0596934	±	0.0117004	0.0616173	±	0.00792614	0.0491363	±	0.0185815	0.0587769	±	0.0104371
Isoamyl cyanide	0.123327	±	0.0299439	0.163289	±	0.0331557	0.176025	±	0.0216716	0.162734	±	0.0277979	0.179737	±	0.0205278	0.14448	±	0.0312336	0.174029	±	0.0263844	0.167201	±	0.0322564	0.167517	±	0.0220799	0.15357	±	0.0305518	0.159128	±	0.0220099
2-Hexenal	0.293565	±	0.0787364	0.039136	±	0.0343785	0.0149194	±	0.0223992	0.0458456	±	0.0347617	0.0263726	±	0.0136517	0.062274	±	0.0442944	0.0247653	±	0.0222408	0.046657	±	0.0302232	0.0307376	±	0.0294932	0.038098	±	0.0285731	0.0151817	±	0.0122563
3-Isothiocyanatoprop-1-ene	0.0353094	±	0.0066853	0.0779192	±	0.0369905	0.0819008	±	0.050368	0.0541307	±	0.0128461	0.0519913	±	0.0123914	0.065094	±	0.0197901	0.0497	±	0.0113538	0.0517446	±	0.0165762	0.0588241	±	0.0174624	0.0578581	±	0.0150561	0.0619307	±	0.0252226
Hexanenitrile	0.00796319	±	0.00158955	0.00957525	±	0.00142862	0.0103864	±	0.00155423	0.00896442	±	0.00121802	0.0104346	±	0.0012219	0.00855593	±	0.0015852	0.00977328	±	0.00131184	0.00978431	±	0.00155335	0.010272	±	0.00191759	0.00897985	±	0.00207216	0.0089933	±	0.00132704
2-isothiocyanatobutane	0.00128717	±	0.000795874	0.00280904	±	0.00171613	0.0043716	±	0.0020687	0.00221218	±	0.00116821	0.00251874	±	0.000960326	0.00207592	±	0.000879677	0.00291141	±	0.00113611	0.00249538	±	0.00106441	0.00291566	±	0.00120632	0.00206075	±	0.000755132	0.00236201	±	0.00109183
4-methyl-2-heptanone	0.00208648	±	0.000578373	0.00354913	±	0.00129892	0.0034745	±	0.00111377	0.00458245	±	0.00152295	0.00500549	±	0.000953456	0.00371256	±	0.0024402	0.00504155	±	0.00121626	0.00443711	±	0.00167961	0.00430721	±	0.00109443	0.00441936	±	0.00159099	0.00483212	±	0.00144142
5-methyl-hexanenitrile	0.00469033	±	0.00103458	0.00521998	±	0.0014235	0.00636445	±	0.00110986	0.00533658	±	0.0014336	0.00625248	±	0.00103098	0.00446865	±	0.00111032	0.00599947	±	0.000963491	0.00587182	±	0.00157543	0.00543132	±	0.00119194	0.00497836	±	0.0012226	0.00538477	±	0.00139398
Heptanonitrile	0.00487144	±	0.00151848	0.0058759	±	0.00122114	0.00635027	±	0.000792477	0.00628905	±	0.0018746	0.00656894	±	0.00090234	0.005485	±	0.00176619	0.00621635	±	0.00102617	0.00664468	±	0.00167783	0.00667559	±	0.00132441	0.00563852	±	0.00158155	0.00579074	±	0.00159084
4-Methylthiazole	0.00528651	±	0.00392766	0.0118906	±	0.00514378	0.0105739	±	0.0039829	0.00917098	±	0.0054338	0.00971847	±	0.00417018	0.0116644	±	0.00699734	0.010052	±	0.00383863	0.00913531	±	0.00607133	0.00975924	±	0.0038105	0.0131124	±	0.00514697	0.0103602	±	0.00474715
octan-1-ol	0.000288578	±	0.000487569	0.000786448	±	0.000345828	0.000459239	±	0.000207524	0.000875128	±	0.000520408	0.000724191	±	0.00032517	0.000914036	±	0.000547516	0.000824555	±	0.000469618	0.000887932	±	0.000661278	0.000705524	±	0.000352087	0.00102704	±	0.000691041	0.000865456	±	0.00046465
4-(methylthio)-butanenitrile	0.0828346	±	0.0264831	0.127857	±	0.0352995	0.181204	±	0.0513159	0.117323	±	0.0380233	0.133762	±	0.0545999	0.103533	±	0.0305675	0.114702	±	0.0362665	0.123428	±	0.0276227	0.125573	±	0.0401942	0.113079	±	0.0307806	0.124945	±	0.0365804
Nonanal	0.00303285	±	0.00151192	0.00435511	±	0.00197592	0.00289299	±	0.00109122	0.00499045	±	0.00259056	0.00490655	±	0.00175842	0.0047391	±	0.00205899	0.00453861	±	0.00197792	0.00518811	±	0.0033069	0.00426183	±	0.00158968	0.00514252	±	0.00264308	0.00447557	±	0.00183035
5-(methylthio)-pentanenitrile	0.00154632	±	0.00096137	0.00418095	±	0.00229645	0.00987234	±	0.00448612	0.00265127	±	0.00210047	0.00424688	±	0.00328144	0.00173318	±	0.00118387	0.00320107	±	0.00232959	0.00291002	±	0.00141413	0.00424008	±	0.00266571	0.00227055	±	0.00145674	0.00340975	±	0.00250785
1,3-bis(1,1-dimethylethyl)-benzene	0.00169213	±	0.000671168	0.00149579	±	0.000685154	0.00113727	±	0.000434436	0.00230609	±	0.00128488	0.00210856	±	0.00130826	0.00160064	±	0.000462662	0.00236515	±	0.00143913	0.00192486	±	0.000858957	0.00168208	±	0.000964109	0.00168395	±	0.000838817	0.0018534	±	0.000837224
Total Aroma	4.17913e+07	±	1.21403e+07	4.19136e+07	±	1.45388e+07	5.7272e+07	±	1.79568e+07	3.76095e+07	±	1.54519e+07	4.0194e+07	±	1.4862e+07	3.90943e+07	±	1.92912e+07	3.98682e+07	±	1.50136e+07	3.81661e+07	±	1.5431e+07	4.32441e+07	±	1.54121e+07	3.75159e+07	±	1.41718e+07	4.21827e+07	±	1.74916e+07
