# Supplementary material for: Quality Evolution and Aroma Profile of Pointed Cabbage in Different Storage Regimes
Source: Front Plant Sci. 2022 Apr 15;13:852817. doi: 10.3389/fpls.2022.852817 (PMC9051525; doi:10.3389/fpls.2022.852817)
Supplement: Supplementary file 2 [file Table_2.XLSX]

## Sheet: Sheet1
	HARVEST			NORMAL AIR						1 kPa O2 + 1.5 kPa CO2						1 kPa O2 + 5 kPa CO2						3 kPa O2 + 1.5 kPa CO2						3 kPa O2 + 5 kPa CO2
	Harvest			February			May			February			May			February			May			February			May			February			May
Formaldehyde				0.043382	±	0.0613514				0.0430588	±	0.0608943				0.133487	±	0.0661426	0.397934	±	0.520124	0.0534131	±	0.0755375	0.128029	±	0.221752				0.409532	±	0.502998
Methanol	0.0766581	±	0.0219869	0.0413955	±	0.0228616	0.0851403	±	0.114942	0.0395095	±	0.00308006	0.135224	±	0.0972496	0.0507597	±	0.0252122	0.0696976	±	0.0665221	0.0637951	±	0.0226256	0.0600234	±	0.0730638	0.0755659	±	0.0127453	0.0586657	±	0.0706237
Acetaldehyde	0.010216	±	0.00359309	0.0275367	±	0.0189228	0.00140804	±	0.00243879	0.0875653	±	0.0287284	0.0166919	±	0.0289112	0.0725063	±	0.0143774	0.0115809	±	0.0108387	0.0917645	±	0.0276568	0.00838233	±	0.00922289	0.126339	±	0.0757732	0.00621048	±	0.0107569
Methanethiol	0.00124975	±	0.00120158	0.00108555	±	8.86634e-05	0.0376011	±	0.050801	0.00752198	±	0.0106377	0.0154231	±	0.00947346	0.00107517	±	0.00152052	0.0120128	±	0.0150384	0.00509274	±	0.00170668	0.00714701	±	0.00619687	0.00611901	±	0.00865359	0.00750111	±	0.00883015
Ethanol	0.229088	±	0.0333165	0.383373	±	0.406641	0.0360004	±	0.0376932	0.38631	±	0.0297811	0.307347	±	0.120726	0.338074	±	0.139184	0.246469	±	0.236475	0.302534	±	0.301231	0.10896	±	0.114549	0.212955	±	0.101197	0.154359	±	0.143803
2-Propenal	0.00434522	±	0.00121254	0.00304937	±	0.00146976	0.0090872	±	0.0132119	0.0245492	±	0.0161668	0.0352815	±	0.030917	0.0114633	±	0.00277259	0.00856431	±	0.00683418	0.0121326	±	0.00407637	0.0202103	±	0.0188914	0.0254545	±	0.0060001	0.0047595	±	0.00337263
Propanal	0.00340797	±	0.00252207				0.0895413	±	0.154377	0.00567849	±	0.0080306	0.00923552	±	0.00919515				0.000772141	±	0.00133739	0.00468205	±	0.00662141	0.0764334	±	0.12358	0.00469968	±	0.00664634
Acetone	0.435762	±	0.0333023	0.471508	±	0.472969	0.12254	±	0.128377	0.254194	±	0.103368	0.195461	±	0.0130891	0.289973	±	0.00388019	0.137579	±	0.143564	0.39149	±	0.273067	0.262251	±	0.151725	0.461258	±	0.00686781	0.237542	±	0.261663
Isopropanol	0.141102	±	0.0176419				0.0290283	±	0.0502784
Dimethyl sulfide							0.0104295	±	0.0104205	0.0410345	±	0.00316077	0.0325599	±	0.0206752	0.0671419	±	0.0373554	0.0237868	±	0.0296215	0.00620274	±	0.00877199	0.0256572	±	0.0228953	0.0140663	±	0.0198928	0.0195414	±	0.0299991
Butenone	0.00188141	±	0.000470909				0.00778637	±	0.0134864	0.00379519	±	0.00536721	0.00786219	±	0.0032695				0.00470183	±	0.00779015				0.00864338	±	0.0126723				0.00517431	±	0.00600915
2-Butanone	0.0114858	±	0.00351159	0.00539949	±	0.00763604	0.0207401	±	0.0359229	0.0166158	±	0.0234983	0.0242277	±	0.00671624										0.0281281	±	0.0487194				0.00614374	±	0.0106413
Ethyl acetate	0.0818223	±	0.0207619	0.0120638	±	0.0103911	0.00442106	±	0.00412413	0.0163277	±	0.0164359	0.0399146	±	0.0349724	0.0163757	±	0.00933999	0.0172024	±	0.0149453	0.00261249	±	0.00369462	0.0119086	±	0.0152072	0.0053075	±	0.00750594	0.0129731	±	0.0114797
Furfural	0.00156062	±	0.00412902	0.00210312	±	0.00238053	0.0187146	±	0.0251425	0.0119758	±	0.00489582	0.0458262	±	0.0196023	0.00655239	±	0.00201029	0.0137394	±	0.0108178	0.0170463	±	0.0047896	0.0423438	±	0.0357745	0.0129831	±	0.0183608	0.0133122	±	0.0149332
Dimethyl disulfide							0.483188	±	0.441093	0.00248797	±	0.00351852	0.0700621	±	0.0689656				0.031443	±	0.0392995				0.12936	±	0.156227				0.0374719	±	0.0577576
Cyclopentanone				0.00910324	±	0.0128739	0.00907561	±	0.0145492	0.0265248	±	0.0302137	0.00911748	±	0.0157919	0.00326089	±	0.00461159	0.00615411	±	0.0098444	0.011897	±	0.00445151	0.0160741	±	0.0164219	0.0258759	±	0.00286484	0.0106851	±	0.00847598
Furan-2-ylmethanol	0.00142141	±	0.000791964				0.00925463	±	0.0160295	0.00379757	±	0.00537057	0.00677379	±	0.0117326				0.000128312	±	0.000222243	0.0113615	±	0.0051064	0.0120041	±	0.0207917
Hexanal							0.00453404	±	0.0073632	0.0104705	±	0.0102921	0.0123952	±	0.00277521	0.00300813	±	0.000148985	0.00358237	±	0.00304659	0.00312433	±	0.00131842	0.00783255	±	0.010932	0.0060522	±	0.000193672	0.000794309	±	0.00137578
Butyrolactone							0.0215099	±	0.0297807	0.0185822	±	0.0174757	0.0365969	±	0.00365277	0.00632279	±	0.00275669	0.014652	±	0.0126465	0.0228516	±	0.0128822	0.0466117	±	0.0419663	0.0233245	±	0.0036103	0.0153338	±	0.0145551
Total Aroma	2.56616e+06	±	779495	2.09723e+06	±	499460	2.43414e+06	±	2.81465e+06	770147	±	107060	582943	±	300834	744842	±	375620	2.96442e+06	±	4.02319e+06	648611	±	416898	511244	±	430287	237507	±	37778.2	1.65887e+06	±	1.58214e+06
